# Supplementary material for: La guerra más salvaje: la invasión japonesa de China
Source: Springer Nature journal article supplement (doi:10.1186/s13046-020-01602-1), 2010-01-01
Supplement: MOESM5 [file 18046942]

**Specific primers used for qRT-PCR (5’ to 3’)**

| Homo-CD68 | Forward | GGAAATGCCACGGTTCATCCA |
| --- | --- | --- |
| Reverse | TGGGGTTCAGTACAGAGATGC |
| Homo-CD80 | Forward | AAACTCGCATCTACTGGCAAA |
| Reverse | GGTTCTTGTACTCGGGCCATA |
| Homo-IL-12p40 | Forward | CGGTCATCTGCCGCAA |
| Reverse | AACCTAACTGCAGGGCACAG |
| Homo-TNF-α | Forward | TCTCGAACCCCGAGTGACAA |
| Reverse | TGAAGAGGACCTGGGAGTAG |
| Homo-CD163 | Forward | TTTGTCAACTTGAGTCCCTTCAC |
| Reverse | TCCCGCTACACTTGTTTTCAC |
| Homo-IL-10 | Forward | GACTTTAAGGGTTACCTGGGTTG |
| Reverse | TCACATGCGCCTTGATGTCTG |
| Homo-Arginase-1 | Forward | TGGACAGACTAGGAATTGGCA |
| Reverse | CCAGTCCGTCAACATCAAAACT |
| HPV-E6 | Forward | GAGAACTGCAATGTT TCAGGACC |
| Reverse | TGTATAGTTGTTTGCAGCTCTGTGC |
| HPV-E7 | Forward | CGGAATTCATGCATGGAGATACACCTACAT |
| Reverse | CGGGAAGCTTATGGTTTCTGAGAACAGATGG |
| Homo-YAP | Forward | TAGCCCTGCGTAGCCAGTTA |
| Reverse | TCATGCTTAGTCCACTGTCTGT |
| Homo-TAZ | Forward | GATCCTGCCGGAGTCTTTCTT |
| Reverse | CACGTCGTAGGACTGCTGG |
| Homo-CCL2 | Forward | CCCCAGTCACCTGCTGTTAT |
| Reverse | TGGAATCCTGAACCCACTTC |
| Homo-TLR9 | Forward | AGTCAATGGCTCCCAGTTCCT |
| Reverse | CGTGAATGAGTGCTCGTGGTA |
| Homo-CXCL5 | Forward | AGCTGCGTTGCGTTTGTTTAC |
| Reverse | TGGCGAACACTTGCAGATTAC |
| Homo-CSF1 | Forward | AGACCTCGTGCCAAATTACATT |
| Reverse | AGGTGTCTCATAGAAAGTTCGGA |
| Homo-CTGF | Forward | ACCGACTGGAAGACACGTTTG |
| Reverse | CCAGGTCAGCTTCGCAAGG |
| Homo-CYR61 | Forward | ACCGCTCTGAAGGGGATCT |
| Reverse | ACTGATGTTTACAGTTGGGCTG |
| Homo-CCNE2 | Forward | TCAAGACGAAGTAGCCGTTTAC |
| Reverse | TGACATCCTGGGTAGTTTTCCTC |
| Homo-CDC6 | Forward | CCAGGCACAGGCTACAATCAG |
| Reverse | AACAGGTTACGGTTTGGACATT |
| Homo-CDK2 | Forward | CCAGGAGTTACTTCTATGCCTGA |
| Reverse | TTCATCCAGGGGAGGTACAAC |
| Homo-E-cadherin | Forward | ACATACACTCTCTTCTCTC |
| Reverse | GTCATTCTGATCGGTTAC |
| Homo-N-cadherin | Forward | ATCATCCTGCTTATCCTT |
| Reverse | TTATCTCTTACATCATCTTCTG |
| Homo-β-catenin | Forward | TACAACTCTCCACAACCT |
| Reverse | CTGTCGTAATAGCCAAGAA |
| Homo-Vimentin | Forward | CTGAGGGAAACTAATCTG |
| Reverse | TTGATAACCTGTCCATCT |
| Homo-β-actin | Forward | TGAAGATCAAGATCATTG |
| Reverse | TAACGCAACTAAGTCATA |
